# Supplementary material for: Diagnostic performance of thioflavin T in one-step RT-PCR for detection of a viral RNA
Source: Royal Society of Chemistry journal article supplement (doi:10.1039/d5ay01327e), 2025-01-01
Supplement: d5ay01327e1.pdf [file d5ay01327e1.pdf]

## Diagnostic performance of thioflavin T in one-step RT-PCR for detection of a viral RNA

### Supplementary Information

Reyhaneh Tavakoli-Koopaei<sup>1</sup>, Fatemeh Javadi-Zarnaghi<sup>1\*</sup>, Fariba Dehghanian<sup>1</sup>, Reza Mohammadi  
Manesh<sup>2,3</sup>

<sup>1</sup> Department of Cell and Molecular Biology & Microbiology, Faculty of Biological Science and Technology, University of Isfahan, Isfahan, Iran.

<sup>2</sup> Department of Parasitology and Mycology, School of Medicine, Isfahan University of Medical Sciences, Isfahan, Iran.

<sup>3</sup> Core Facilities Research Laboratory, Mycology Reference Laboratory, Isfahan University of Medical Sciences, Isfahan, Iran

\*Corresponding author: [fa.javadi@sci.ui.ac.ir](mailto:fa.javadi@sci.ui.ac.ir)

#### Contents

**Supplementary Table. SI. The list of GQ sequences detected with Thioflavin T.**

**Supplementary Table. SII. The amplicon sequence of ScienCell™ SARS-CoV-2 RT-PCR kit.**

**Supplementary Table. SIII. The fluorescent signal of negative viral RNA samples (Background signal determination).**

**Supplementary Figure. SI. The calibration curve of signal response versus concentration of viral load.**

**Supplementary Table. SI.** Previously reported GQ sequence detected with ThT with sequence name, nucleotide content, melting temperature and the GC content. The GQ sequences are ordered according to the length.

| GQ name | GQ sequence                  | Length | Tm   | GC (%) | Ref      |
|---------|------------------------------|--------|------|--------|----------|
| GQ-1    | GGGTTTTGGGTTTTGGGTTTTGGGTTTT | 28     | 65.6 | 43     | [3]      |
| GQ-2    | TTGGGTAGGGCGGGTTGGGTT        | 21     | 65.0 | 62     | [13]     |
| GQ-3    | ATGGGAAGGGAGGGATGGGT         | 20     | 60.9 | 60     | [14]     |
| PW17    | GGGTAGGGCGGGTTGGG            | 17     | 60.5 | 76     | [15, 16] |
| 22AG    | AGGGTTAGGGTTAGGGTTAGGG       | 22     | 59.5 | 55     | [6-11]   |

|             |                              |    |      |    |        |
|-------------|------------------------------|----|------|----|--------|
| TBA-29      | GTCCGTGGTAGGGCAGGTTGGGGTGACT | 29 | 72.7 | 64 | [1, 2] |
| AGRO 100    | GGTGGTGGTGGTTGTGGTGGTGGTGG   | 26 | 71.4 | 65 | [5]    |
| ATP aptamer | ACCTGGGGGAGTATTGCG GAGGAAGGT | 27 | 71.8 | 65 | [4]    |
| c-Myc       | TGAGGGTGGGTAGGGTGGGTAA       | 22 | 63.3 | 59 | [12]   |

**Supplementary Table. SII.** The amplicon sequence of the ScienCell™ SARS-CoV-2 RT-PCR kit. The ScienCell™ primer set amplified the 71-length nucleotide sequence of the SARS-CoV-2 N gene. The GC content of this amplicon is 52% (it is less than 60%), which is a good candidate region to be amplified with the TQsyn RT-PCR method.

| Target Gene | Amplicon sequence                                                                                           | Amplicon size | Target gene position | GC content |
|-------------|-------------------------------------------------------------------------------------------------------------|---------------|----------------------|------------|
| N           | <u>GACCCCAAATCAGCG</u><br>AAATGCACCCCGCATT<br>ACGTTTGGTGGACCCT<br><u>CAGATTCAACTGGCAG</u><br><u>TAACCAG</u> | 71            | 28287 - 28358        | 52.11%     |

**Supplementary Table. SIII.** The fluorescent signal of negative viral RNA samples and the calculated average of them. The TQsyn RT-PCR reactions were done for eleven RNA-negative samples (samples from individuals who were negative for SARS-CoV-2). The calculated average of these samples (1643.45) is considered as the background (B.G.) and is subtracted from the fluorescent signal of any other sample in the report (test or controls).

| Negative sample ID | ThT Fluorescent signal |
|--------------------|------------------------|
| Neg. 1             | 1741                   |
| Neg. 2             | 1436                   |
| Neg. 3             | 1503                   |
| Neg. 4             | 1659                   |
| Neg. 5             | 1476                   |
| Neg. 6             | 1599                   |
| Neg. 7             | 1632                   |
| Neg. 8             | 1734                   |
| Neg. 9             | 1734                   |
| Neg. 10            | 1795                   |
| Neg. 11            | 1769                   |
| Average background | 1643.45                |
| Standard deviation | 125.61                 |

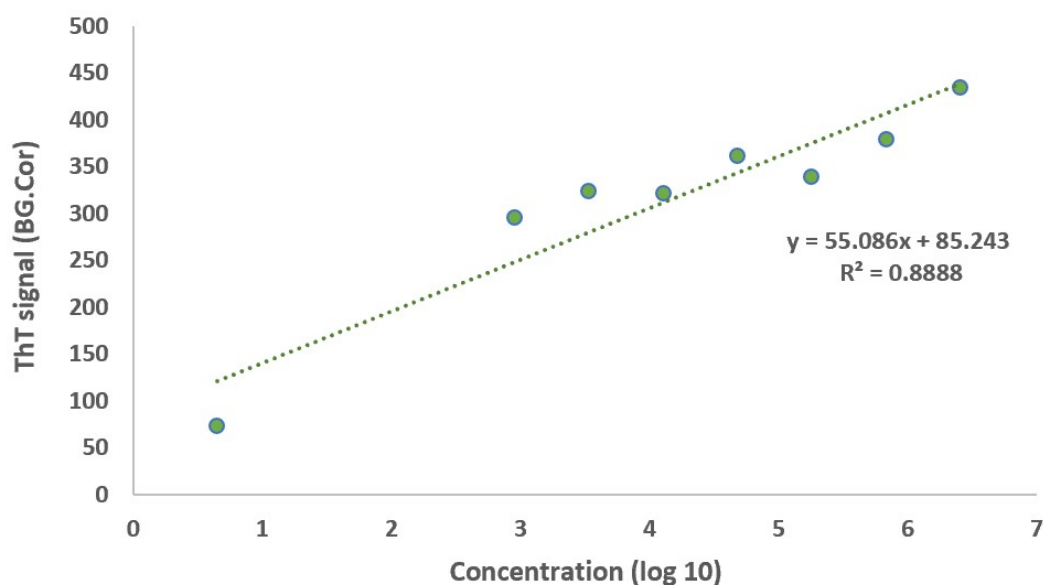

**Supplementary Figure. SI.** Calibration curve illustrating the relationship between Thioflavin T (ThT) fluorescence signal and log-transformed analyte concentration. Data points represent measured fluorescence intensities at known concentrations, while the fitted linear regression line demonstrates the correlation. The regression equation and coefficient of determination ( $R^2$ ) are shown on the graph and were used to estimate the Limit of Detection (LOD) and Limit of Quantitation (LOQ) according to the method described by Armbruster & Pry [18] and CLSI EP17-A2 (2012)<sup>1</sup>.

<sup>1</sup> <https://clsi.org/shop/standards/ep17/>

## References

1. Li, Y., et al., *Thioflavin T as a fluorescence light-up probe for both parallel and antiparallel G-quadruplexes of 29-mer thrombin binding aptamer*. Analytical and bioanalytical chemistry, 2016. **408**: p. 8025-8036.
2. Liu, X., et al., *Thioflavin T as an efficient G-quadruplex inducer for the highly sensitive detection of thrombin using a new foster resonance energy transfer system*. ACS Applied Materials & Interfaces, 2015. **7**(30): p. 16458-16465.
3. Ge, J., et al., *A highly sensitive label-free sensor for Mercury ion (Hg<sup>2+</sup>) by inhibiting thioflavin T as DNA G-quadruplexes fluorescent inducer*. Talanta, 2014. **122**: p. 85-90.
4. Liu, H., et al., *A facile label-free G-quadruplex based fluorescent aptasensor method for rapid detection of ATP*. Spectrochimica Acta Part A: Molecular and Biomolecular Spectroscopy, 2017. **175**: p. 164-167.
5. Tong, L.-l., et al., *Stable label-free fluorescent sensing of biothiols based on ThT direct inducing conformation-specific G-quadruplex*. Biosensors and Bioelectronics, 2013. **49**: p. 420-425.
6. Mohanty, J., et al., *Thioflavin T as an efficient inducer and selective fluorescent sensor for the human telomeric G-quadruplex DNA*. Journal of the American Chemical Society, 2013. **135**(1): p. 367-376.
7. Renaud de la Faverie, A., et al., *Thioflavin T as a fluorescence light-up probe for G4 formation*. Nucleic acids research, 2014. **42**(8): p. e65-e65.
8. JoonáLee, I., *Label/quencher-free detection of single-nucleotide changes in DNA using isothermal amplification and G-quadruplexes*. Analyst, 2016. **141**(24): p. 6503-6506.
9. Jiang, H.-X., et al., *G-quadruplex fluorescent probe-mediated real-time rolling circle amplification strategy for highly sensitive microRNA detection*. Analytica Chimica Acta, 2016. **943**: p. 114-122.
10. Zhou, F., et al., *One-strand oligonucleotide probe for fluorescent label-free "turn-on" detection of T4 polynucleotide kinase activity and its inhibition*. Analyst, 2015. **140**(16): p. 5650-5655.
11. Ma, C., et al., *Thioflavin T as a fluorescence probe for label-free detection of T4 polynucleotide kinase/phosphatase and its inhibitors*. Molecular and Cellular Probes, 2015. **29**(6): p. 500-502.
12. Verma, S., et al., *Spectroscopic studies of Thioflavin-T binding to c-Myc G-quadruplex DNA*. Spectrochimica Acta Part A: Molecular and Biomolecular Spectroscopy, 2019. **212**: p. 388-395.
13. Du, Y.-C., L.-N. Zhu, and D.-M. Kong, *Label-free thioflavin T/G-quadruplex-based real-time strand displacement amplification for biosensing applications*. Biosensors and Bioelectronics, 2016. **86**: p. 811-817.
14. Chen, T.-X., et al., *Label-free fluorescent strategy for sensitive detection of tetracycline based on triple-helix molecular switch and G-quadruplex*. Chinese Chemical Letters, 2017. **28**(7): p. 1380-1384.
15. Ma, C., et al., *Label-free molecular beacon for real-time monitoring of DNA polymerase activity*. Analytical and bioanalytical chemistry, 2016. **408**: p. 3275-3280.
16. Wen, Y., et al., *A sensitive and label-free Pb (II) fluorescence sensor based on a DNAzyme controlled G-quadruplex/thioflavin T conformation*. Sensors, 2016. **16**(12): p. 2155.
17. Liu, Y., et al., *Ratiometric fluorescence sensor for the microRNA determination by catalyzed hairpin assembly*. ACS sensors, 2017. **2**(10): p. 1430-1434.
18. Armbruster, D.A. and T. Pry, *Limit of blank, limit of detection and limit of quantitation*. The clinical biochemist reviews, 2008. **29**(Suppl 1): p. S49.
